# Supplementary material for: Genetic Parameters and Genomic Regions Underlying Growth and Linear Type Traits in Akkaraman Sheep
Source: MDPI journal article supplement (doi:10.3390/genes13081414), 2022-08-10
Supplement: s1 [file s1]

**Supplementary Table S1.** Descriptive statistics of growth and linear type traits

| Trait             | N   | Min.  | Mean  | SD   | Max   |
|-------------------|-----|-------|-------|------|-------|
| <b>BW (kg)</b>    | 451 | 2.96  | 4.59  | 0.71 | 6.54  |
| <b>WW (kg)</b>    | 449 | 14.10 | 25.71 | 4.29 | 36.61 |
| <b>180DW (kg)</b> | 452 | 19.33 | 42.87 | 7.99 | 68.05 |
| <b>preADG</b>     | 450 | 72    | 234   | 46   | 365   |
| <b>postADG</b>    | 456 | 11    | 168   | 71   | 396   |
| <b>180ADG</b>     | 451 | 82    | 212   | 70   | 352   |
| <b>BCS</b>        | 473 | 2.00  | 3.66  | 0.98 | 5.00  |
| <b>TS</b>         | 469 | 2.00  | 4.78  | 1.46 | 8.00  |
| <b>RLRV</b>       | 470 | 2     | 3.68  | 0.81 | 5     |
| <b>GRRV</b>       | 471 | 4     | 5.35  | 0.89 | 7     |
| <b>RW</b>         | 473 | 3     | 5.38  | 1.34 | 8     |
| <b>RLW</b>        | 473 | 2     | 3.39  | 0.92 | 5     |
| <b>RLFA</b>       | 473 | 2     | 3.39  | 0.92 | 5     |
| <b>GRSV</b>       | 472 | 3     | 5.39  | 0.87 | 7     |
| <b>RLSV</b>       | 469 | 3     | 4.41  | 0.66 | 5     |
| <b>BL</b>         | 473 | 4     | 4.91  | 0.82 | 7     |
| <b>CW</b>         | 470 | 3     | 5.34  | 1.02 | 8     |

Notes: **N**= Number of observations; **SD**= Standard deviation; **BW**= Birth weight; **WW**= Weaning weight; **180DW**= 180 days adjusted weight; **preADG**= pre-weaning average daily gain; **postADG**=post-weaning average daily gain; **180ADG**= 180 days average daily gain; **BCS**= Body condition score; **TS**= Tail size; **RLRV**=Rear legs (rear view); **GRRV**= Gigot roundness (rear view); **RW**= Rump width; **RLW**= Rear legs width; **RLFA**= Rear legs foot angle; **GRSV**= Gigot roundness (side view); **RLSV**= Rear legs (side view); **BL**= Body length; **CW**= Chest width
