# Supplementary material for: Genetic Parameters and Genomic Regions Underlying Growth and Linear Type Traits in Akkaraman Sheep
Source: MDPI journal article supplement (doi:10.3390/genes13081414), 2022-08-10
Supplement: s1 [file s1]

**Supplementary Table S2.** Heritability, genetic and phenotypic correlations of growth and linear type traits.

| Trait          | BW              | WW              | 180DW           | preADG          | postADG         | sixADG          | BCS             | TS              | RLRV            | GRRV            | RW              | RLW             | RLFA            | GRSV            | RLSV            | BL              | CW              |
|----------------|-----------------|-----------------|-----------------|-----------------|-----------------|-----------------|-----------------|-----------------|-----------------|-----------------|-----------------|-----------------|-----------------|-----------------|-----------------|-----------------|-----------------|
| <b>BW</b>      | <b>.39(.12)</b> | .32(.04)        | .34(.04)        | .16(.04)        | .30(.04)        | .26(.04)        | .21(.04)        | .28(.04)        | .10(.04)        | .19(.04)        | .13(.04)        | -.11(.04)       | .03(.04)        | .17(.04)        | .09(.04)        | .22(.04)        | .14(.04)        |
| <b>WW</b>      | .88(.13)        | <b>.38(.13)</b> | .85(.04)        | .98(.03)        | .34(.03)        | .84(.00)        | .30(.04)        | .60(.04)        | .18(.04)        | .50(.04)        | .42(.04)        | -.03(.04)       | -.10(.04)       | .50(.04)        | .08(.04)        | .53(.04)        | .43(.04)        |
| <b>180DW</b>   | .96(.13)        | .92(.04)        | <b>.52(.13)</b> | .83(.02)        | .75(.03)        | .99(.00)        | .38(.04)        | .67(.03)        | .24(.04)        | .56(.04)        | .48(.04)        | .05(.04)        | .00(.04)        | .56(.04)        | .08(.04)        | .66(.04)        | .53(.04)        |
| <b>preADG</b>  | .60(.19)        | .99(.01)        | .95(.01)        | <b>.29(.12)</b> | .31(.04)        | .84(.02)        | .29(.04)        | .58(.04)        | .17(.04)        | .49(.04)        | .42(.04)        | -.01(.04)       | -.10(.04)       | .51(.04)        | .06(.04)        | .52(.04)        | .43(.04)        |
| <b>postADG</b> | .71(.14)        | .69(.17)        | .96(.03)        | .77(.14)        | <b>.51(.13)</b> | .75(.04)        | .29(.04)        | .47(.04)        | .21(.04)        | .38(.04)        | .33(.04)        | .08(.04)        | .08(.04)        | .39(.04)        | .08(.04)        | .50(.04)        | .39(.04)        |
| <b>sixADG</b>  | .83(.16)        | .96(.01)        | 1.00(.00)       | .96(.01)        | .97(.02)        | <b>.51(.13)</b> | .38(.04)        | .66(.03)        | .24(.04)        | .56(.04)        | .49(.04)        | .06(.04)        | .00(.04)        | .57(.04)        | .08(.04)        | .66(.04)        | .53(.04)        |
| <b>BCS</b>     | .62(.18)        | .72(.13)        | .94(.12)        | .74(.14)        | .91(.21)        | .97(.12)        | <b>.32(.12)</b> | .45(.04)        | .06(.04)        | .47(.04)        | .45(.04)        | .01(.04)        | .01(.04)        | .35(.04)        | .00(.04)        | .34(.04)        | .46(.04)        |
| <b>TS</b>      | .75(.15)        | .91(.05)        | .91(.04)        | .90(.05)        | .81(.09)        | .91(.04)        | .80(.08)        | <b>.50(.13)</b> | .15(.04)        | .71(.04)        | .67(.04)        | -.02(.04)       | -.05(.04)       | .60(.04)        | .06(.04)        | .63(.04)        | .63(.04)        |
| <b>RLRV</b>    | .30(.17)        | .49(.15)        | .64(.16)        | .51(.17)        | .58(.17)        | .65(.16)        | .21(.19)        | .41(.16)        | <b>.26(.11)</b> | .09(.04)        | .03(.04)        | .17(0.04)       | .13(.04)        | .04(.04)        | .12(.04)        | .15(.04)        | .08(.04)        |
| <b>GRRV</b>    | .59(.18)        | .89(.07)        | .91(.06)        | .90(.07)        | .86(.12)        | .92(.06)        | .96(.07)        | .91(.03)        | .33(.19)        | <b>.30(.12)</b> | .72(.04)        | .03(.04)        | -.02(.04)       | .65(.03)        | .04(.04)        | .62(.04)        | .69(.03)        |
| <b>RW</b>      | .41(.17)        | .84(.09)        | .82(.07)        | .88(.09)        | .71(.12)        | .83(.07)        | .85(.08)        | .87(.04)        | .12(.21)        | .83(.14)        | <b>.25(.11)</b> | .10(.04)        | -.03(.04)       | .67(.04)        | .02(.03)        | .60(.03)        | .71(.03)        |
| <b>RLW</b>     | -.25(.14)       | -.02(.12)       | .24(.09)        | -.03(.14)       | .31(.09)        | .26(.10)        | -.66(.25)       | .04(.12)        | .44(.12)        | .16(.14)        | .32(.15)        | <b>.52(.13)</b> | .03(.04)        | .04(.04)        | .01(.04)        | .19(.04)        | .04(.04)        |
| <b>RLFA</b>    | .57(.51)        | -.30(.20)       | .14(.29)        | -.33(.21)       | .39(.32)        | .14(.29)        | .14(.36)        | -.19(.26)       | .65(.33)        | -.04(.35)       | -.08(.38)       | .11(.28)        | <b>.39(.12)</b> | -.09(.04)       | .27(.04)        | .00(.04)        | -.02(.04)       |
| <b>GRSV</b>    | .46(.17)        | .88(.07)        | .87(.06)        | .91(.07)        | .81(.11)        | .88(.06)        | .83(.12)        | .88(.05)        | .14(.20)        | .97(.03)        | .96(.03)        | .11(.15)        | -.31(.28)       | <b>.20(.10)</b> | .10(.04)        | .67(.04)        | .68(.03)        |
| <b>RLSV</b>    | .36(.28)        | .31(.28)        | .32(.28)        | .32(.27)        | .36(.32)        | .29(.28)        | -.09(.25)       | .22(.24)        | .78(.38)        | .03(.27)        | -.09(.31)       | .00(.22)        | .96(.14)        | .31(.26)        | <b>.16(.09)</b> | .07(.04)        | .07(.04)        |
| <b>BL</b>      | .90(.40)        | .97(.05)        | .92(.04)        | .98(.06)        | .88(.07)        | .93(.04)        | .94(.13)        | .92(.04)        | .68(.30)        | NA              | .99(.04)        | .59(.16)        | .21(.62)        | 1.00(.25)       | .25(.42)        | <b>.07(.07)</b> | .62(.04)        |
| <b>CW</b>      | .43(.17)        | .86(.09)        | .81(.06)        | .90(.09)        | .71(.09)        | .82(.07)        | .79(.07)        | .83(.05)        | .31(.20)        | .96(.03)        | .92(.11)        | .15(.15)        | .06(.41)        | .97(.03)        | .23(.26)        | 1.00(.21)       | <b>.30(.11)</b> |

Notes: Diagonal values represent the genomic heritability of the overlapping trait where phenotypic correlations are above the diagonal and genetic correlations below the diagonal.

NA= Could not be reliably estimated.
