# Supplementary figures and images for: Genetic Parameters and Genomic Regions Underlying Growth and Linear Type Traits in Akkaraman Sheep
Source: MDPI journal article supplement (doi:10.3390/genes13081414), 2022-08-10

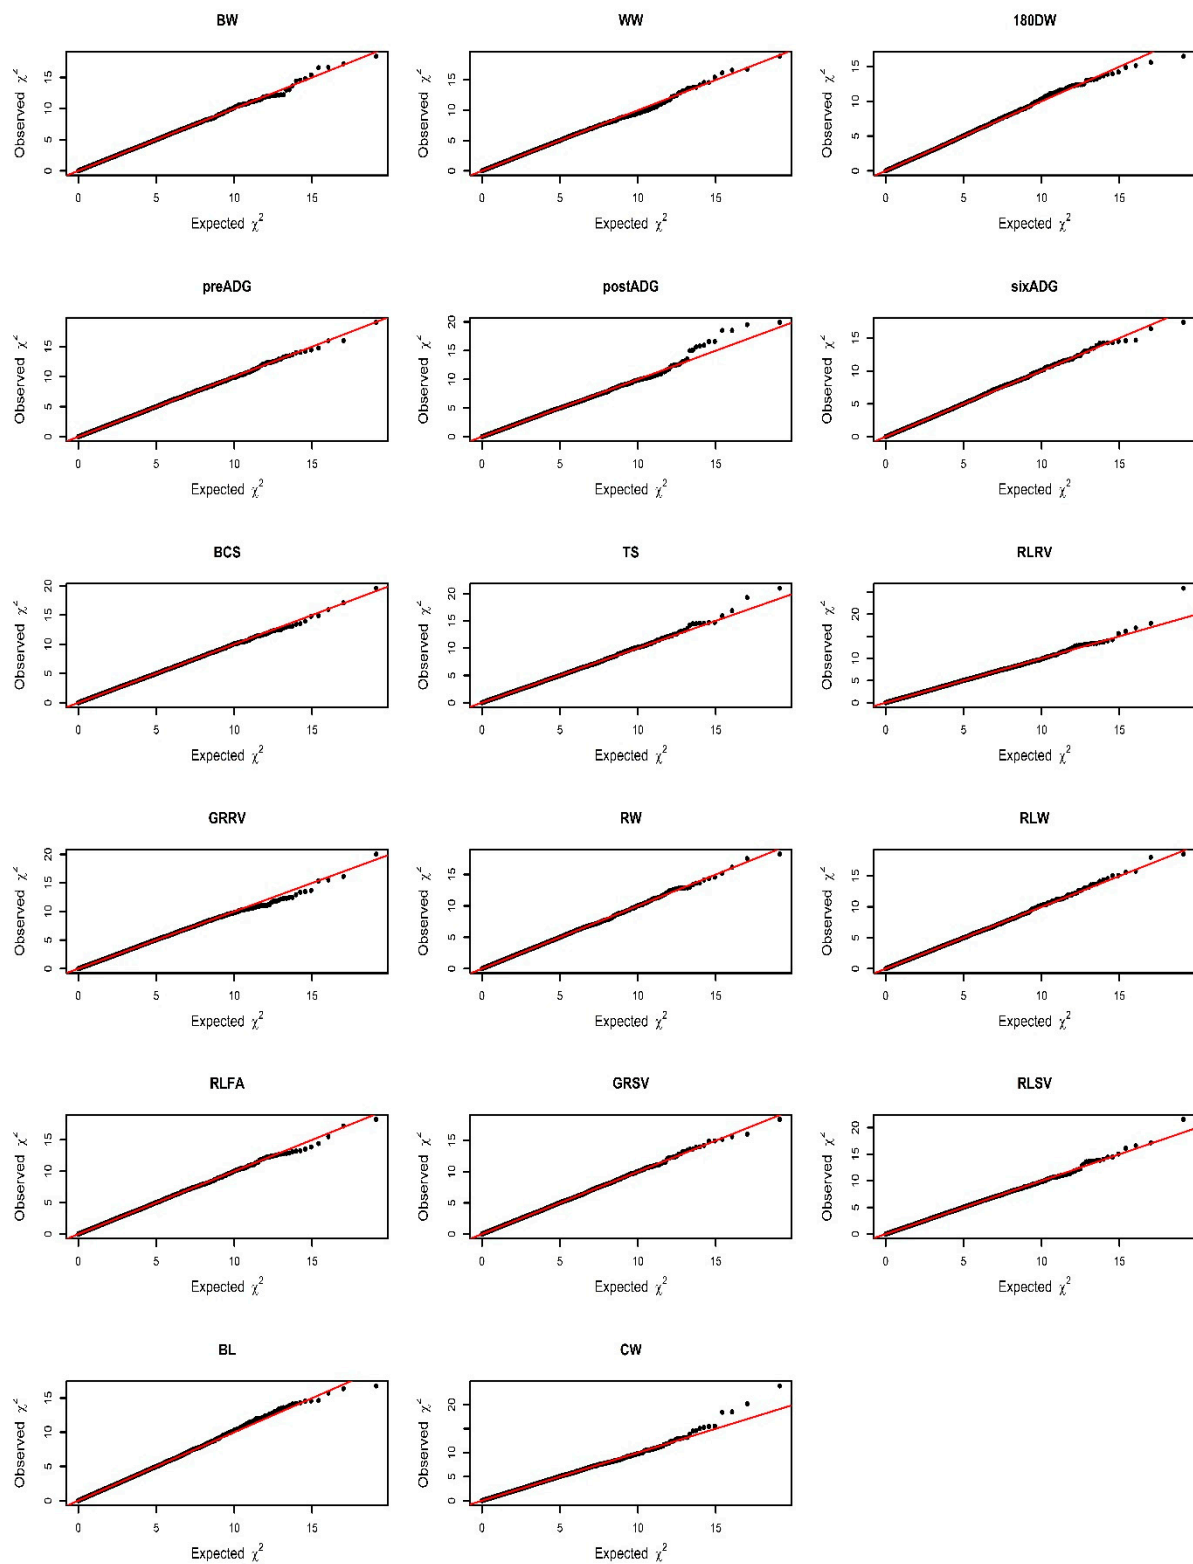

**Supplementary Figure S1. Q-Q plots of GWA analyses**

Supplement: s1 [file s1]
